# Supplementary material
Source: Springer Nature journal article supplement (https://www.springermedizin.de/resource/supplementary/13256_2010_1617_MOESM4_ESM.pdf/9648092)

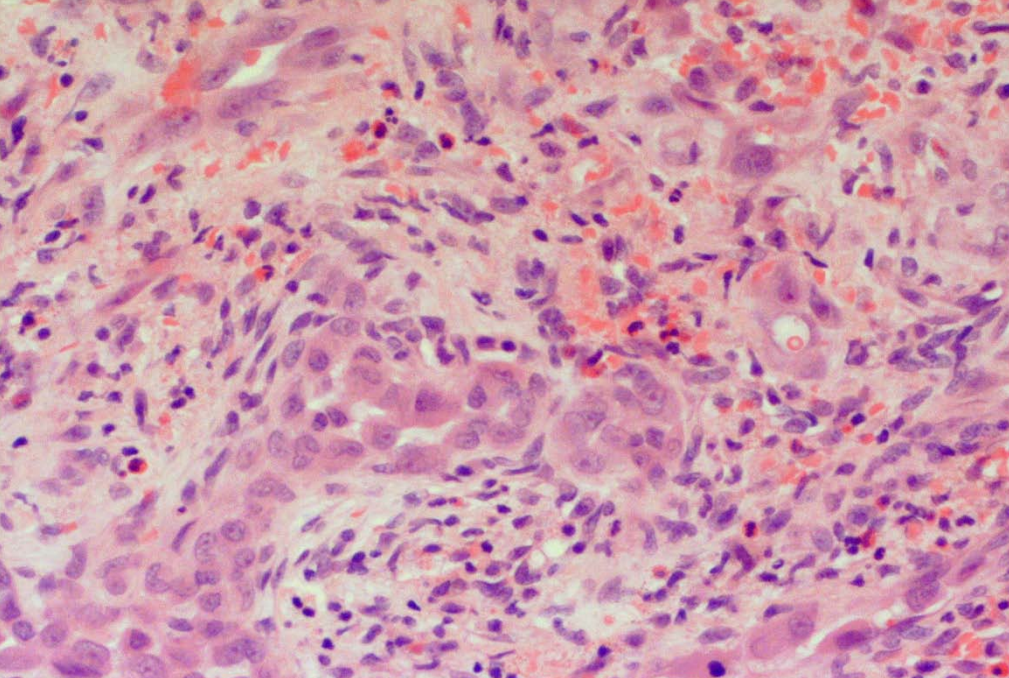

Supplement: MOESM4 [file 9648092]
